# Supplementary material
Source: PubMed Central journal article supplement (PMC8702873)
Supplement: AJSLP-30-1819-s004.pdf [file AJSLP-30-1819-s004.pdf]

**Supplemental Material S4.** Randomization sequence.

| Visit | Session Order | 3101   | 3102   | 3104   | 6102   | 6103   | 6104   | 6018   |
|-------|---------------|--------|--------|--------|--------|--------|--------|--------|
| 1     | First         | VA – A | VA – B | US – A | US – A | VA – A | VA – B | US – B |
|       | Second        | US – B | US – A | VA – B | VA – B | US – B | UA – A | VA – A |
| 2     | First         | VA – B | VA – A | VA – B |
|       | Second        | US – A | US – B | US – A |
| 3     | First         | US – A | US – A | US – A | US – A | VA – B | VA – A | US – A |
|       | Second        | VA – B | VA – B | VA – B | VA – B | US – A | US – B | VA – B |
| 4     | First         | VA – A | VA – A | VA – A | VA – B | US – A | US – B | US – B |
|       | Second        | US – B | US – B | US – B | US – A | VA – B | VA – A | VA – A |
| 5     | First         | VA – A | VA – A | VA – A | VA – B | US – A | US – A | VA – A |
|       | Second        | US – B | US – B | US – B | US – A | VA – B | VA – B | US – B |
| 6     | First         | US – B | US – A | US – A | US – B | VA – A | VA – B | VA – A |
|       | Second        | VA – A | VA – B | VA – B | VA – A | US – B | US – A | US – B |
| 7     | First         | VA – B | VA – B | US – A | US – B | US – B | US – B | US – A |
|       | Second        | US – A | US – A | VA – B | VA – A | VA – A | VA – A | VA – B |
| 8     | First         | US – A | US – A | VA – B |
|       | Second        | VA – B | VA – B | US – A |
| 9     | First         | US – A | US – B | US – B | US – B | US – A | US – B | VA – B |
|       | Second        | VA – B | VA – A | VA – A | VA – A | VA – B | VA – A | US – A |
| 10    | First         | US – B | US – B | VA – A | VA – A | US – B | US – A | US – B |
|       | Second        | VA – A | VA – A | US – B | US – B | VA – A | VA – B | VA – A |

*Note.* VA = Visual–Acoustic Biofeedback; US = Ultrasound Biofeedback; A = Word List A; B = Word List B.
