# Supplementary material
Source: PubMed Central journal article supplement (PMC8702873)

**Supplemental Material S6. Exploring preferential response to treatment.** Scatterplot representing articulatory awareness skill relative to auditory-perceptual acuity. Articulatory awareness and auditory-perceptual acuity are presented as unitless z-scores relative to a sample of typically developing children (higher is better). Point size shows one participant (6104) with a significant difference in normalized F3-F2 distance between biofeedback conditions.

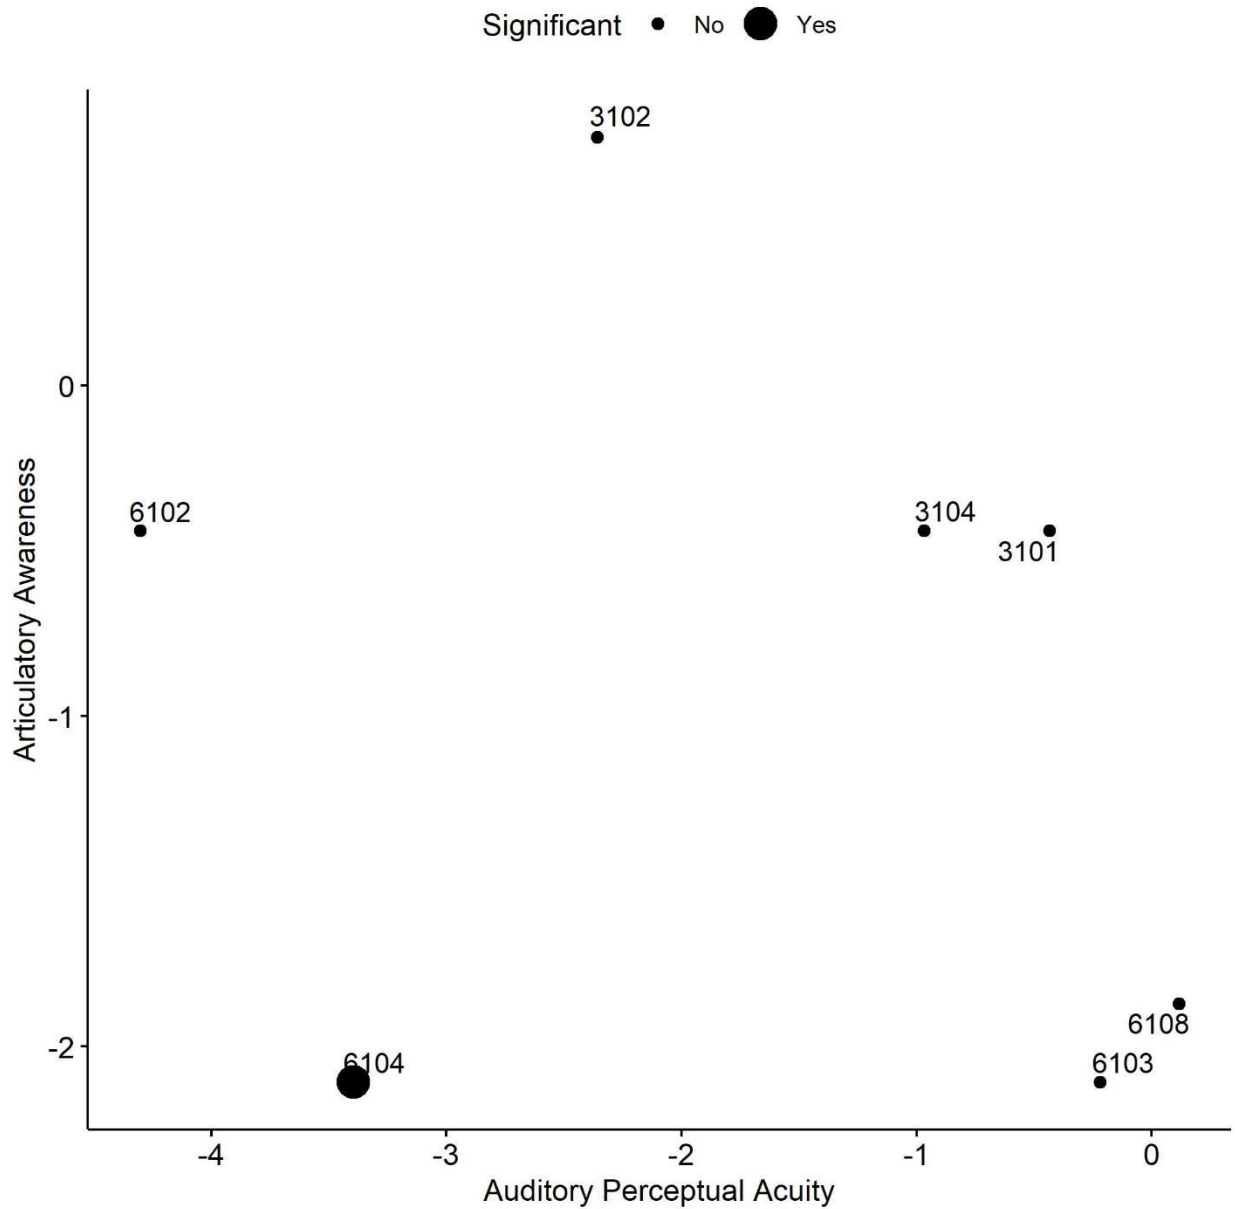

Supplement: AJSLP-30-1819-s006.pdf [file AJSLP-30-1819-s006.pdf]
