# Supplementary material
Source: PubMed Central journal article supplement (PMC8702873)

**Supplemental Material S7. Exploring magnitude of generalization.** Scatterplots representing relationships between amount of generalization (acoustic effect size; lower is better) and age, articulatory awareness, auditory-perceptual acuity, and Speech Mindset Scale total score (clockwise from top left; higher values are better). Coefficients and significance for Spearman's correlations are presented with each plot.

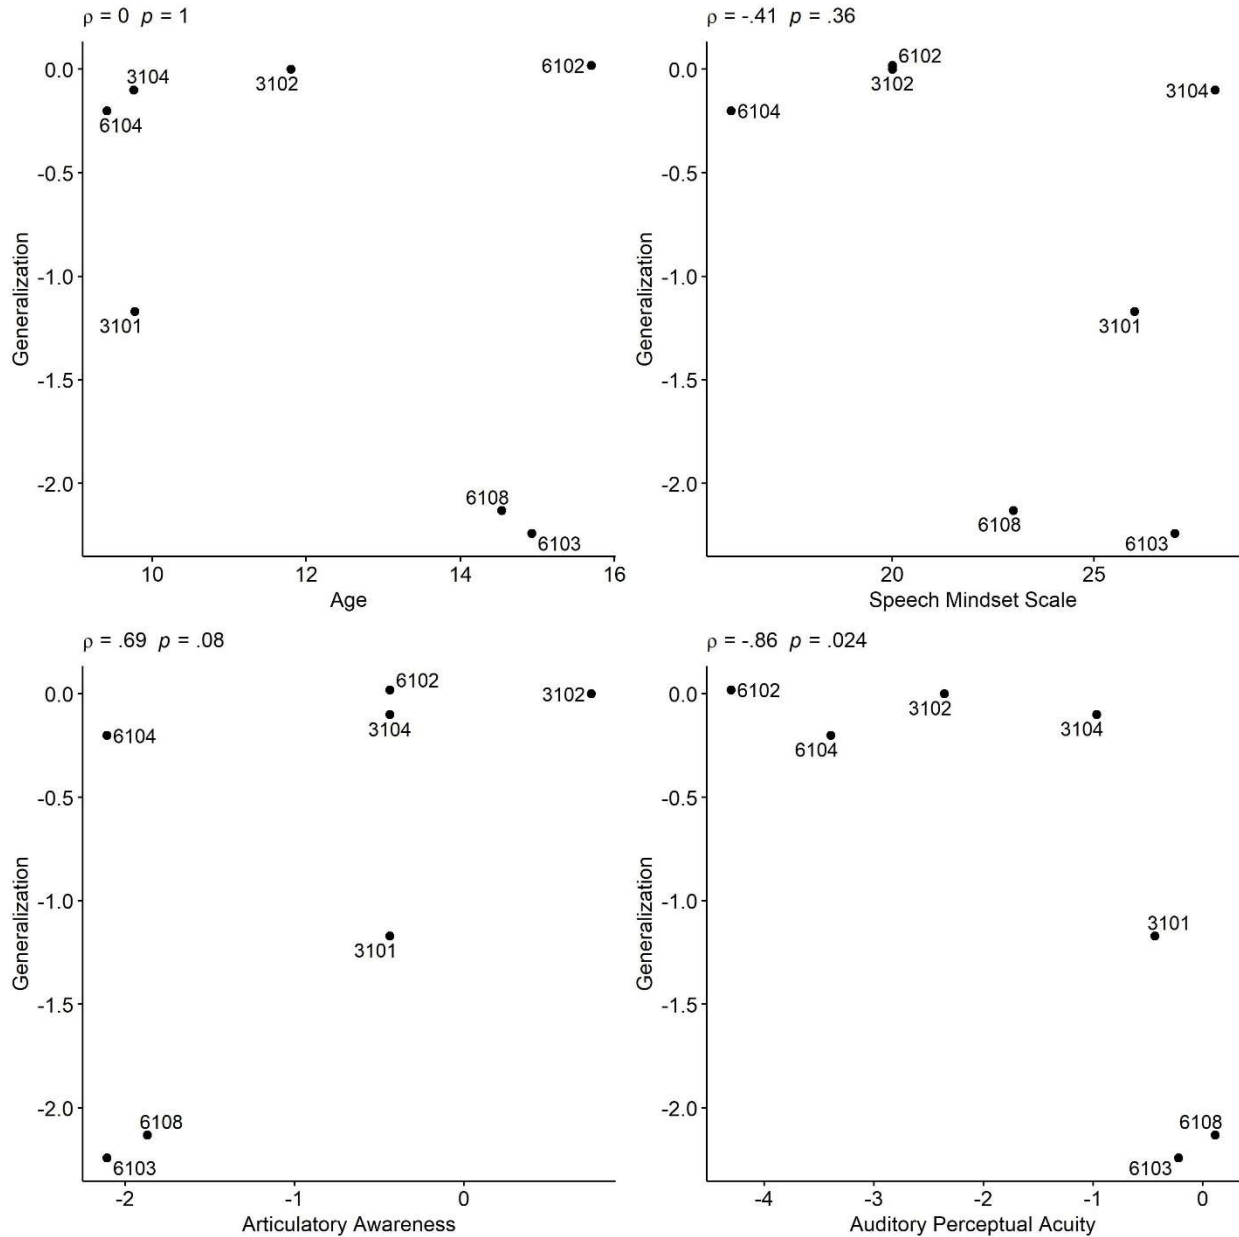

Supplement: AJSLP-30-1819-s007.pdf [file AJSLP-30-1819-s007.pdf]
